# Supplementary material for: Identification of metabolic vulnerabilities of receptor tyrosine kinases-driven cancer
Source: PubMed Central journal article supplement (PMC6586626; doi:10.1038/s41467-019-10427-2), 2019-06-20
Supplement: 41467_2019_10427_MOESM1_ESM.pdf [file 41467_2019_10427_MOESM1_ESM.pdf]

1 Supplementary Information for

2 **Identification of metabolic vulnerabilities of receptor tyrosine**  
3 **kinases-driven cancer**

4

5 Jin et al.

6

7 **Supplementary Figure 1**

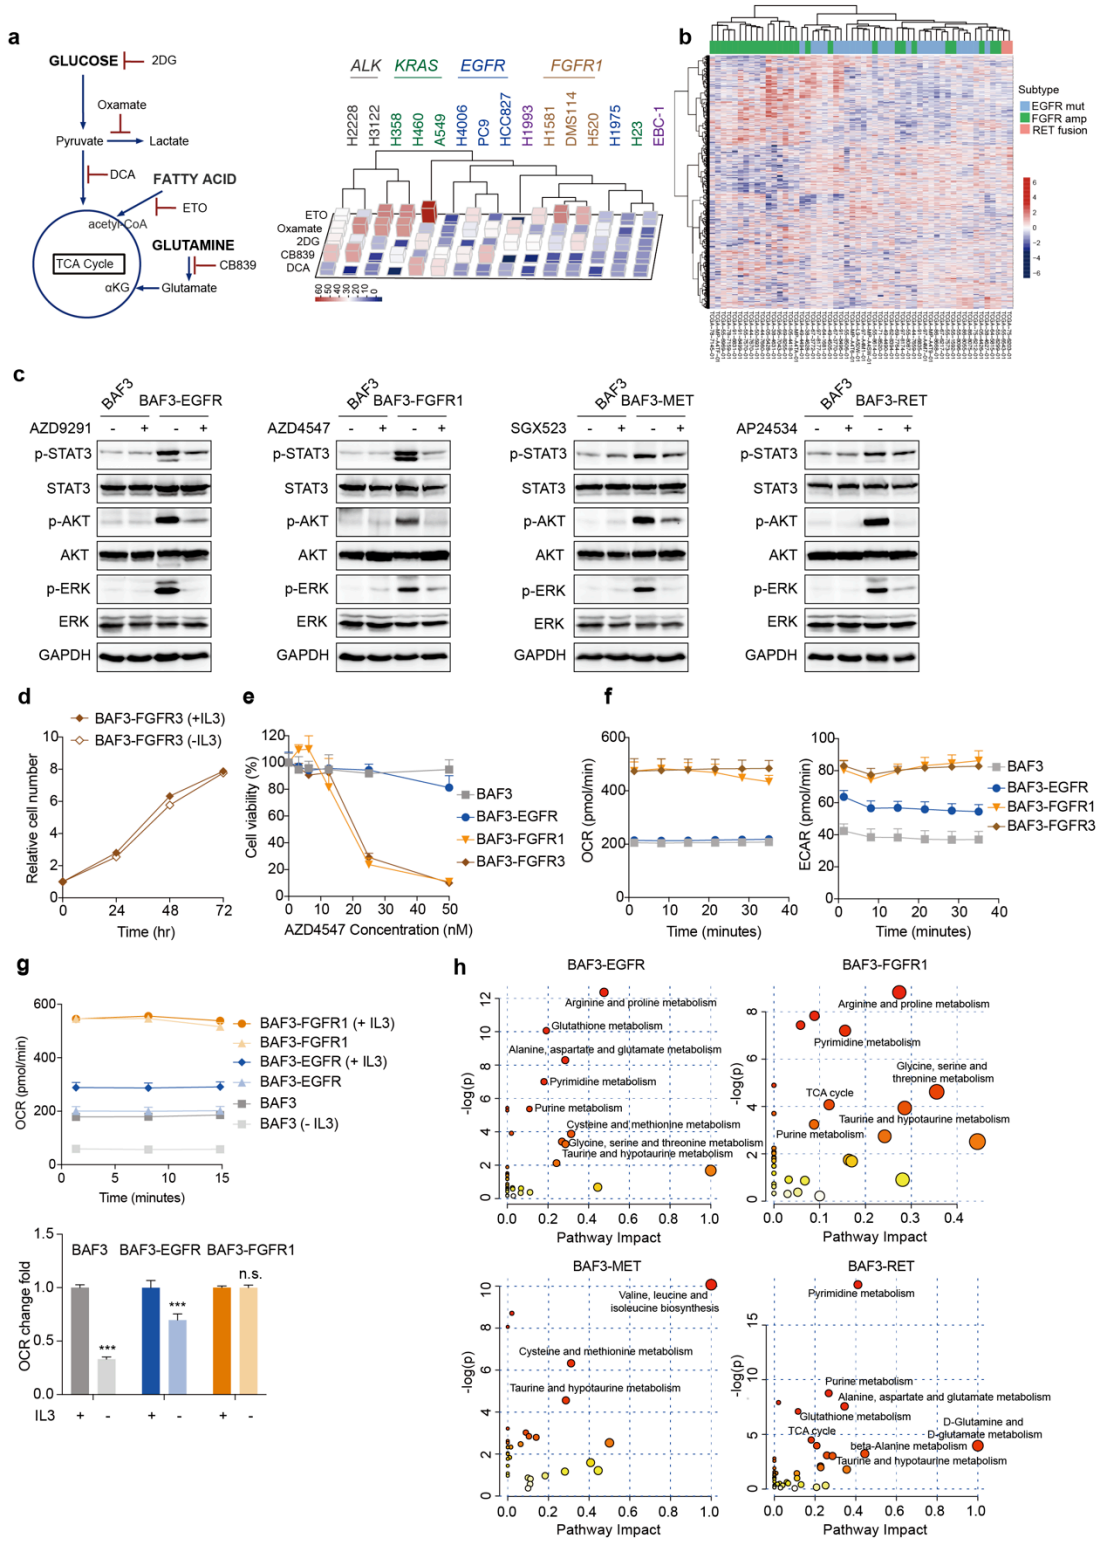

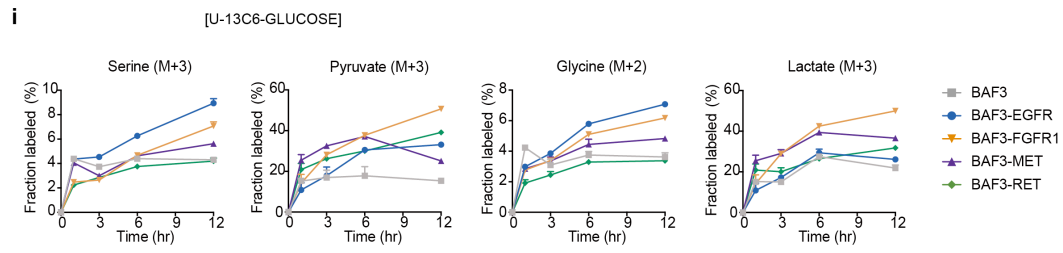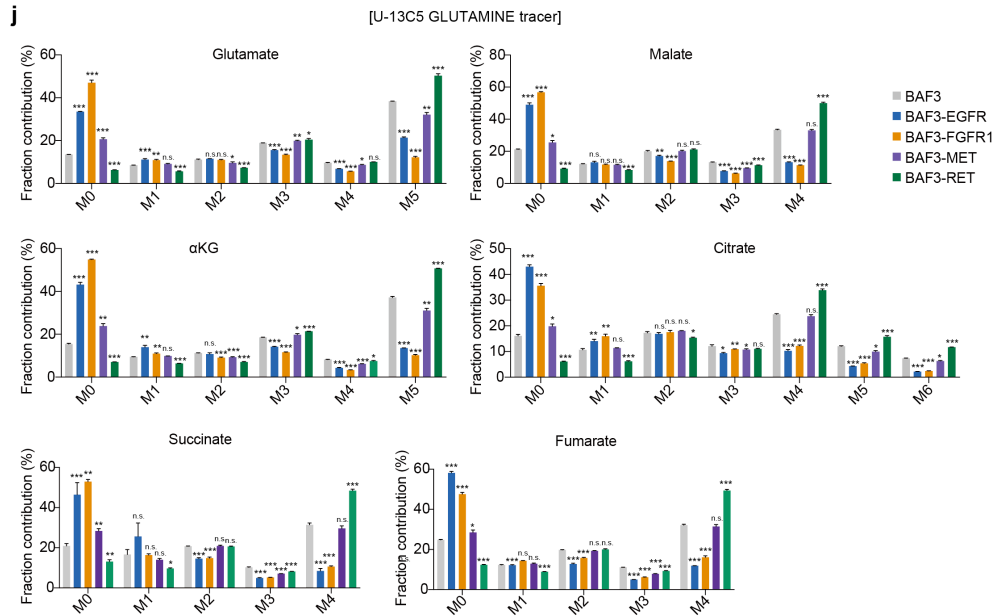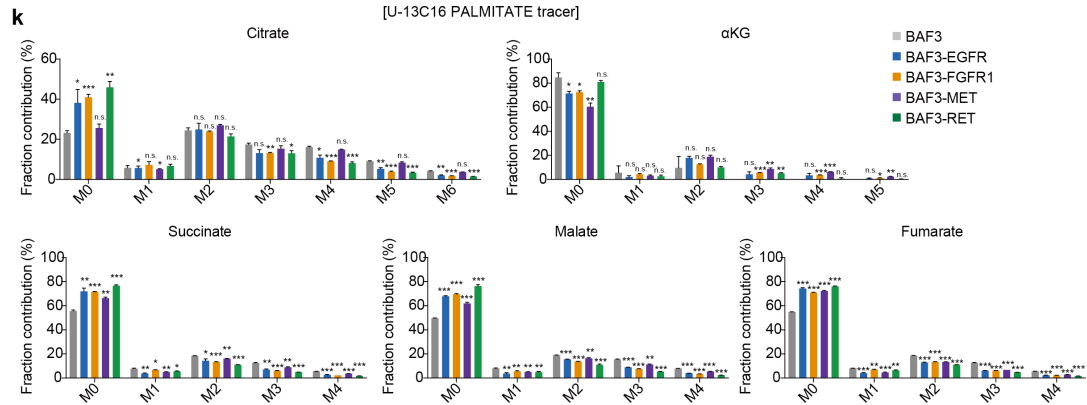

I

## EGFR alteration

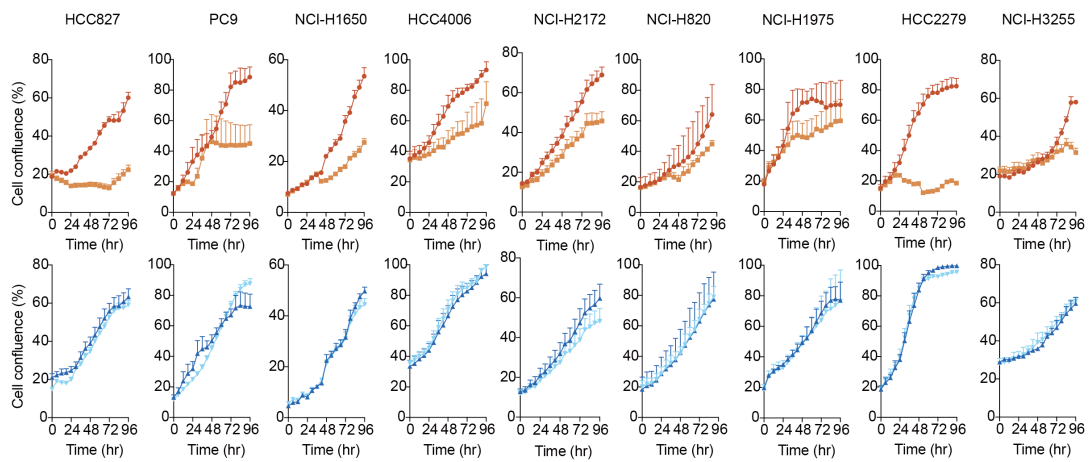

## FGFR alteration

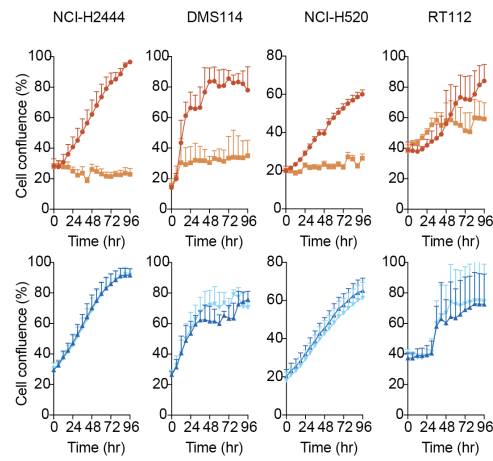

## RET alteration

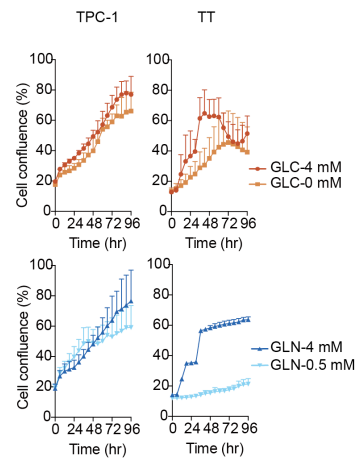

## Wildtype

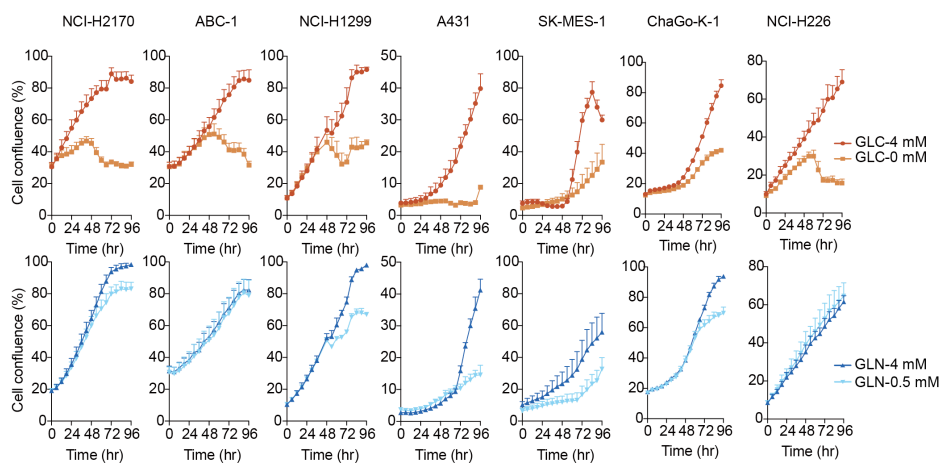

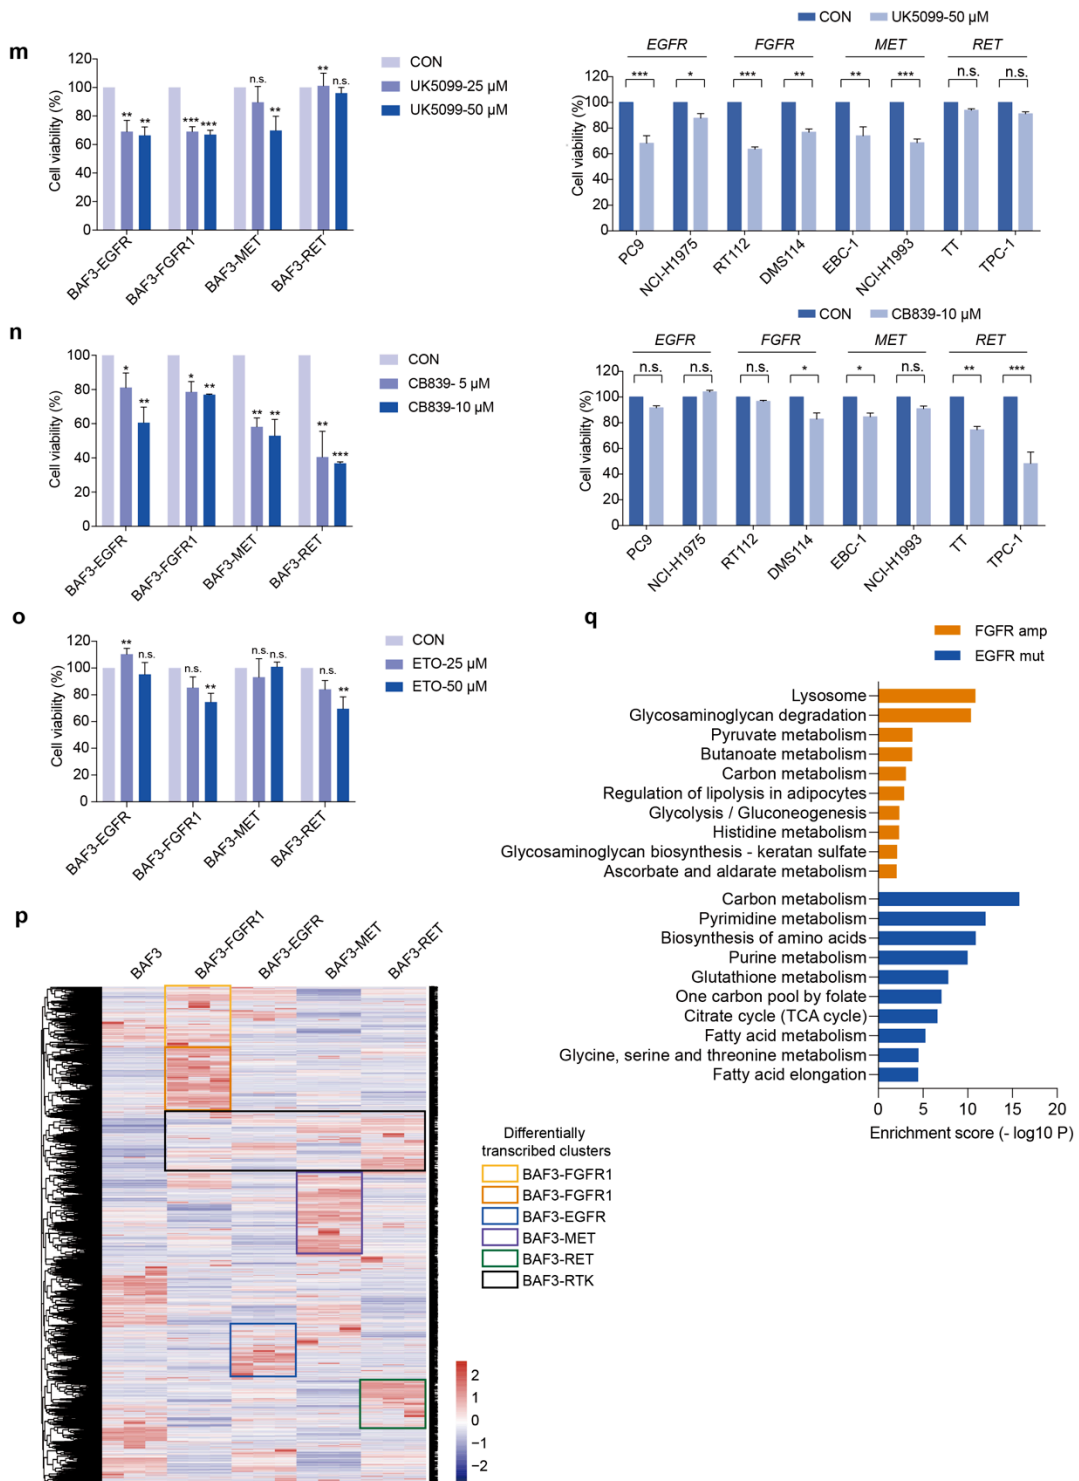

12

13

14 **Supplementary Figure 1**

15 **a**, Sensitivity of metabolism-targeted inhibitors in lung cancer cell lines bearing  
16 indicated genetic alterations. Left, Diagram showing the inhibitors used for metabolic  
17 pathways intervention. Right, Bar plot obtained by the unbiased hierarchical cluster  
18 analysis of the cell lines according to cell growth inhibition rate of individual  
19 metabolic inhibitors. Cells were treated with ETO (50  $\mu$ M), CB839 (10  $\mu$ M), Oxamate  
20 (30 mM), DCA (10 mM) or 2DG (2.5 mM) for 72 hr. Cell growth inhibition rate was  
21 measured using the CCK8 assay **b**, Heatmap obtained by cluster analysis using the  
22 mRNA data of metabolic genes of 740 lung adenocarcinoma patients in the TCGA  
23 data sets. The columns indicate different patients bearing indicated genetic alterations,  
24 and the rows indicate different metabolic genes. **c**, Immunoblotting analysis. Cells  
25 were treated with indicated RTK inhibitors (100 nM) for 1 hr before being subjected  
26 to immunoblotting analysis using indicated antibodies. **d**, IL3 dependence analysis.  
27 Cell growth fold changes with or without IL3 were plotted by counting cell numbers.  
28 Data were means of triplicates; error bars represented SD. **e**, Cell sensitivity to RTK  
29 inhibition. Cells were treated with AZD4547 at indicated concentrations for 72 hr and  
30 cell viability was analyzed using CCK8 assay. Data were means of triplicates; error

31 bars represented SD. **f**, Oxygen consumption rate (OCR) and extracellular  
32 acidification rate (ECAR) measurement using Seahorse XF96 analyzer. **g**. The impact  
33 of IL3 on OCR. BAF3-RTK or the parental BAF3 cells were cultured in the presence  
34 or absence of IL3. OCR were measured using Seahorse XF96 analyzer. Data in **f, g**  
35 were means of five replicates; error bars represented SD. **h**, Metabolite set enrichment  
36 analysis. The metabolome view showing the representative metabolic pathways  
37 arranged by  $p < 0.05$  (from pathway enrichment analysis) on Y-axis, and pathway  
38 impact  $> 0.1$  (from pathway topology analysis) on X-axis, carried out with  
39 MetaboAnalyst 4.0. The node color was based on its p value and the node radius was  
40 determined by its pathway impact value. The altered metabolite sets were arranged  
41 according to 1.5-fold cutoff and  $P < 0.01$  in relative to parental BAF3 cells. **i**, Time  
42 courses of  $^{13}\text{C}$  labeled intensities of metabolites from  $[\text{U-}^{13}\text{C}_6]$ -glucose flux analysis  
43 measured by GC/MS. BAF3 and BAF3-RTK cells were cultured in the presence of  
44  $[\text{U-}^{13}\text{C}_6]$ -glucose for 1, 3, 6 or 12 hr. The labeling curves were plotted by measuring  
45 fractional  $^{13}\text{C}$  enrichment at 1, 3, 6 and 12 hr respectively. **j-k**,  $^{13}\text{C}$  labeled intensities  
46 of metabolites from  $[\text{U-}^{13}\text{C}_5]$ -glutamine or  $[\text{U-}^{13}\text{C}_{16}]$ -palmitate. BAF3 and

47 BAF3-RTK cells were cultured for 24 hr in the presence of either [U-<sup>13</sup>C<sub>5</sub>]-glutamine  
48 or [U-<sup>13</sup>C<sub>16</sub>]-palmitate. The intermediate metabolites in TCA cycle labeled with <sup>13</sup>C  
49 isotopologue were measured by GC/MS. Data in **j-k** were means of triplicates; error  
50 bars represented SEM. **l**, Glucose/glutamine dependency analysis. Cells were cultured  
51 with indicated concentrations of glucose (GLC)/glutamine (GLN) for 4 days. Images  
52 were acquired every 6 hr by automated real-time assessment using IncuCyte ZOOM.  
53 Growth curves were plotted as the change in confluence percentage. Data were means  
54 of six replicates; error bars represented SD. **m-o**, Cell sensitivity to targeted  
55 metabolism inhibition. Cells were treated with indicated inhibitors for 72 hr. The  
56 viability of BAF3 and BAF3-RTK cells were analyzed using CCK8 assay, and the  
57 viability of cancer cells were analyzed using the SRB assay. The assays were  
58 performed in biological triplicates, and error bars represented SD. **p**, Transcriptome  
59 analysis. Heatmap of transcriptome profiling representing the mRNA levels of genes  
60 performed by RNA-seq. The rows indicate different genes, and the columns indicate  
61 different cells (n = 3 per cell line). **q**, KEGG pathway enrichment analysis the  
62 metabolic genes between EGFR- and FGFR-activated tumors that displayed in **b**. The



63 significantly enriched metabolism-related KEGG pathways ( $P < 0.05$ ) were presented.

64 For each KEGG pathway, the bar shows the enrichment score of the pathway

65 according to p value. Unless otherwise stated, BAF3 parental cells were cultured with

66 IL3 and BAF3-RTK cells were cultured without IL3. For all bar graphs, \*\*\*  $p < 0.001$ ,

67 \*\*  $p < 0.01$ , \*  $p < 0.05$ , n.s.  $\geq 0.05$  for Student's pairwise t test. Source data are provided

68 as a Source Data file.

69

70 **Supplementary Figure 2**

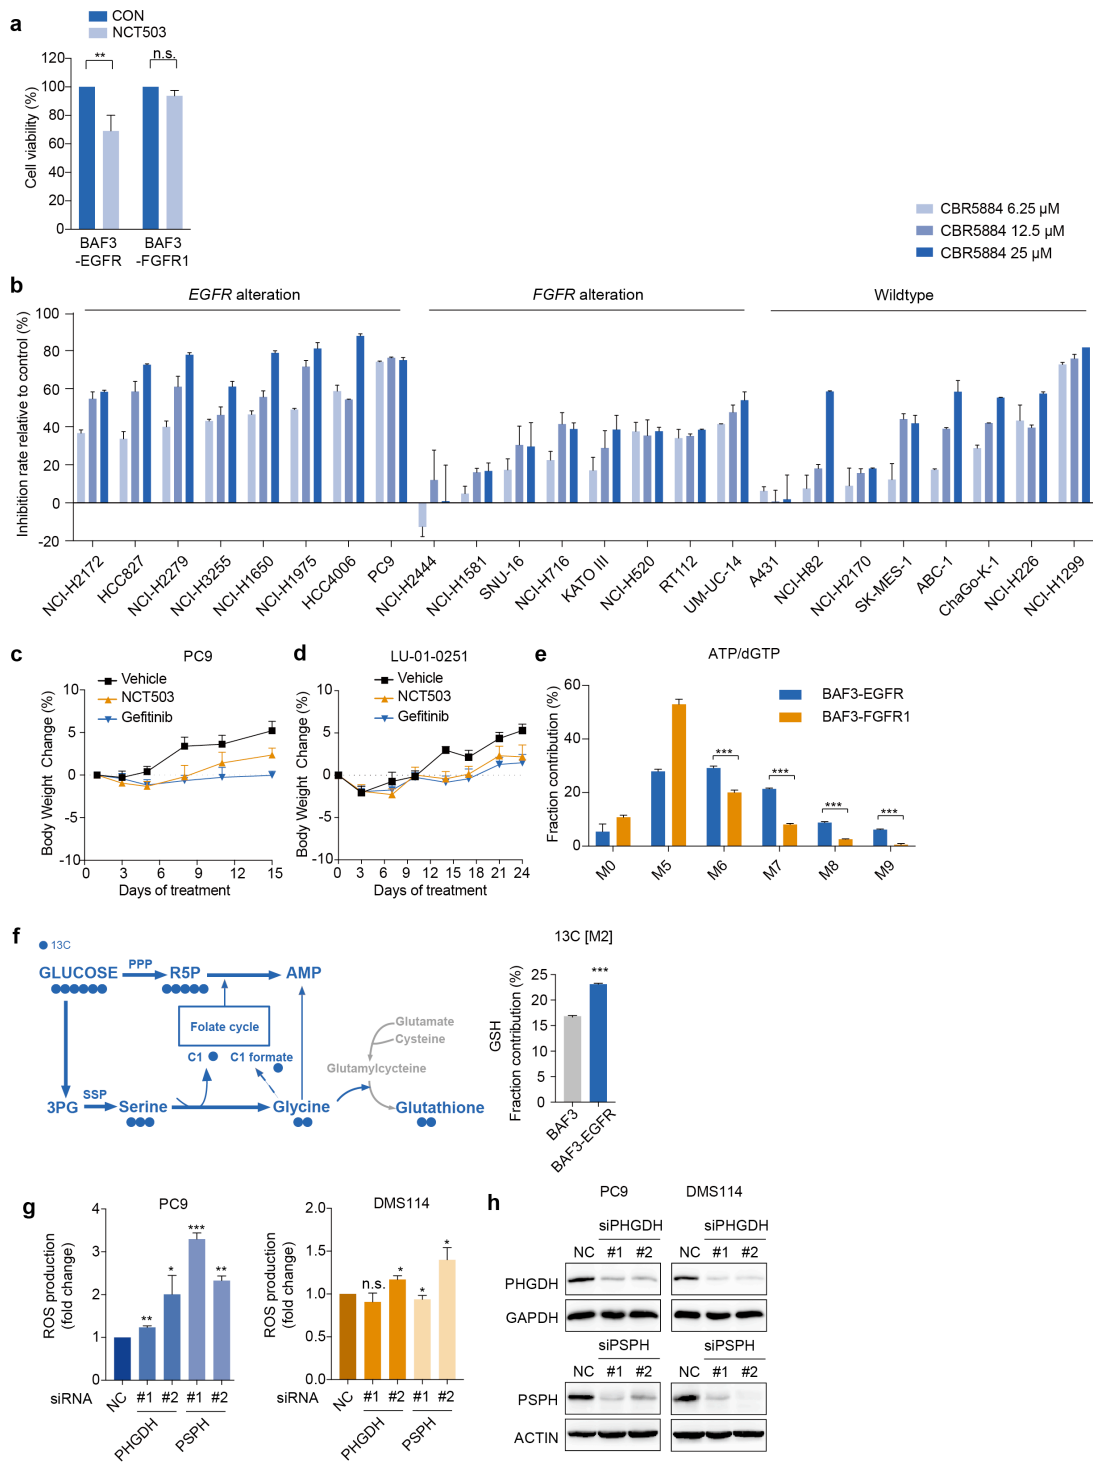

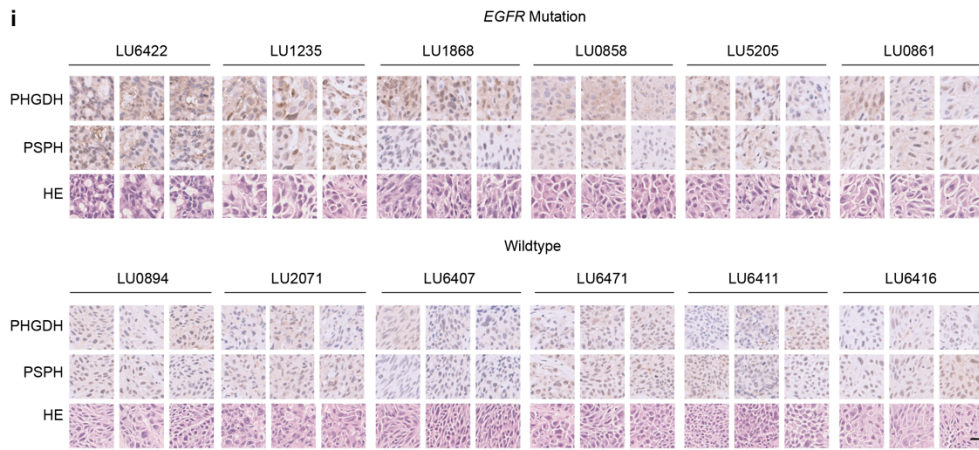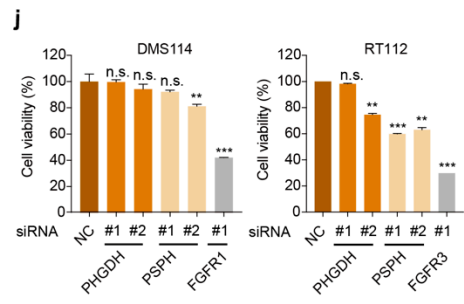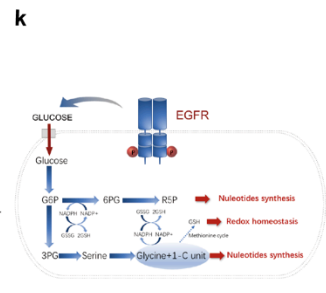

73 **Supplementary Figure 2**

74 **a**, Cell sensitivity to PHGDH inhibition. Cell viability was measured using the CCK8  
75 assay following the treatment with NCT503 (20  $\mu$ M) for 72 hr. BAF3-EGFR/FGFR1  
76 cells were cultured without IL3. The assays were performed in biological triplicates,  
77 and error bars represented SD. **b**, Sensitivity of a panel of cancer cells to PHGDH  
78 inhibition. Cancer cells with indicated genetic alterations were treated with CBR5884  
79 at 6.25, 12.5 or 25  $\mu$ M for 6 days and the inhibition rate of cell growth was  
80 determined relative to untreated control. Data were means of duplicates and error bars  
81 represented SD. **c**, **d**, Body weight change of PC9 xenograft and LU-01-0251 PDX  
82 models. Mice were dosed with NCT-503 (40 mg/kg) or Gefitinib (5 mg/kg for PC9  
83 and 1 mg/kg for LU-01-0251) daily for indicated days (n = 8 for PC9, n = 6 for  
84 LU-01-0251). Data were means and error bars represented SEM. **e**,  $^{13}\text{C}$  enrichment of  
85 purine nucleotides. BAF3-EGFR/FGFR1 cells were cultured in the presence of  
86 [U- $^{13}\text{C}_6$ ]-glucose for 24 hr without IL3. **f**, Tracer scheme illustrating the flux of  
87 glucose to glutathione via SSP determined by  $^{13}\text{C}$ -labeled metabolites (Left) and the  
88  $^{13}\text{C}$  enrichment of glutathione (Right). Cells were cultured in the presence of  
89 [U- $^{13}\text{C}_6$ ]-glucose for 24 hr, and the incorporation percentage of  $^{13}\text{C}$  from glucose was

90 analyzed by QTOF-MS. Data were means of triplicates; error bars represented SEM.

91 **g**, ROS level measurement. PC9 and DMS114 cells were transfected with indicated

92 siRNAs for 72 hr. Data were means of duplicates; error bars represented SD. **h**,

93 Immunoblotting analysis. Cells were transfected with indicated siRNAs for 48 hr

94 before being subjected to immunoblotting using indicated antibodies. **i**,

95 Immunohistochemistry analysis of representative tumor tissues from NSCLC PDX

96 tumors with *EGFR* mutation or wildtype RTK. Shown are representative field from

97 one section per tumor tissue (n = 3 independent tumor tissues from each PDX model).

98 Scale bar, 20  $\mu$ m. **j**, Cell viability assay. DMS114 and RT112 cells were transfected

99 with indicated siRNAs for 72 hr and cell viability was analyzed by counting cell

100 numbers. The assays were performed in duplicates, and error bars represented SD. **k**,

101 Diagram depicting the metabolic reprogramming upon EGFR activation. For all bar

102 graphs, \*\*\* p < 0.001, \*\* p < 0.01, \* p < 0.05, n.s.  $\geq$  0.05 for Student's pairwise t test.

103 Source data are provided as a Source Data file.

104

105 **Supplementary Figure 3**

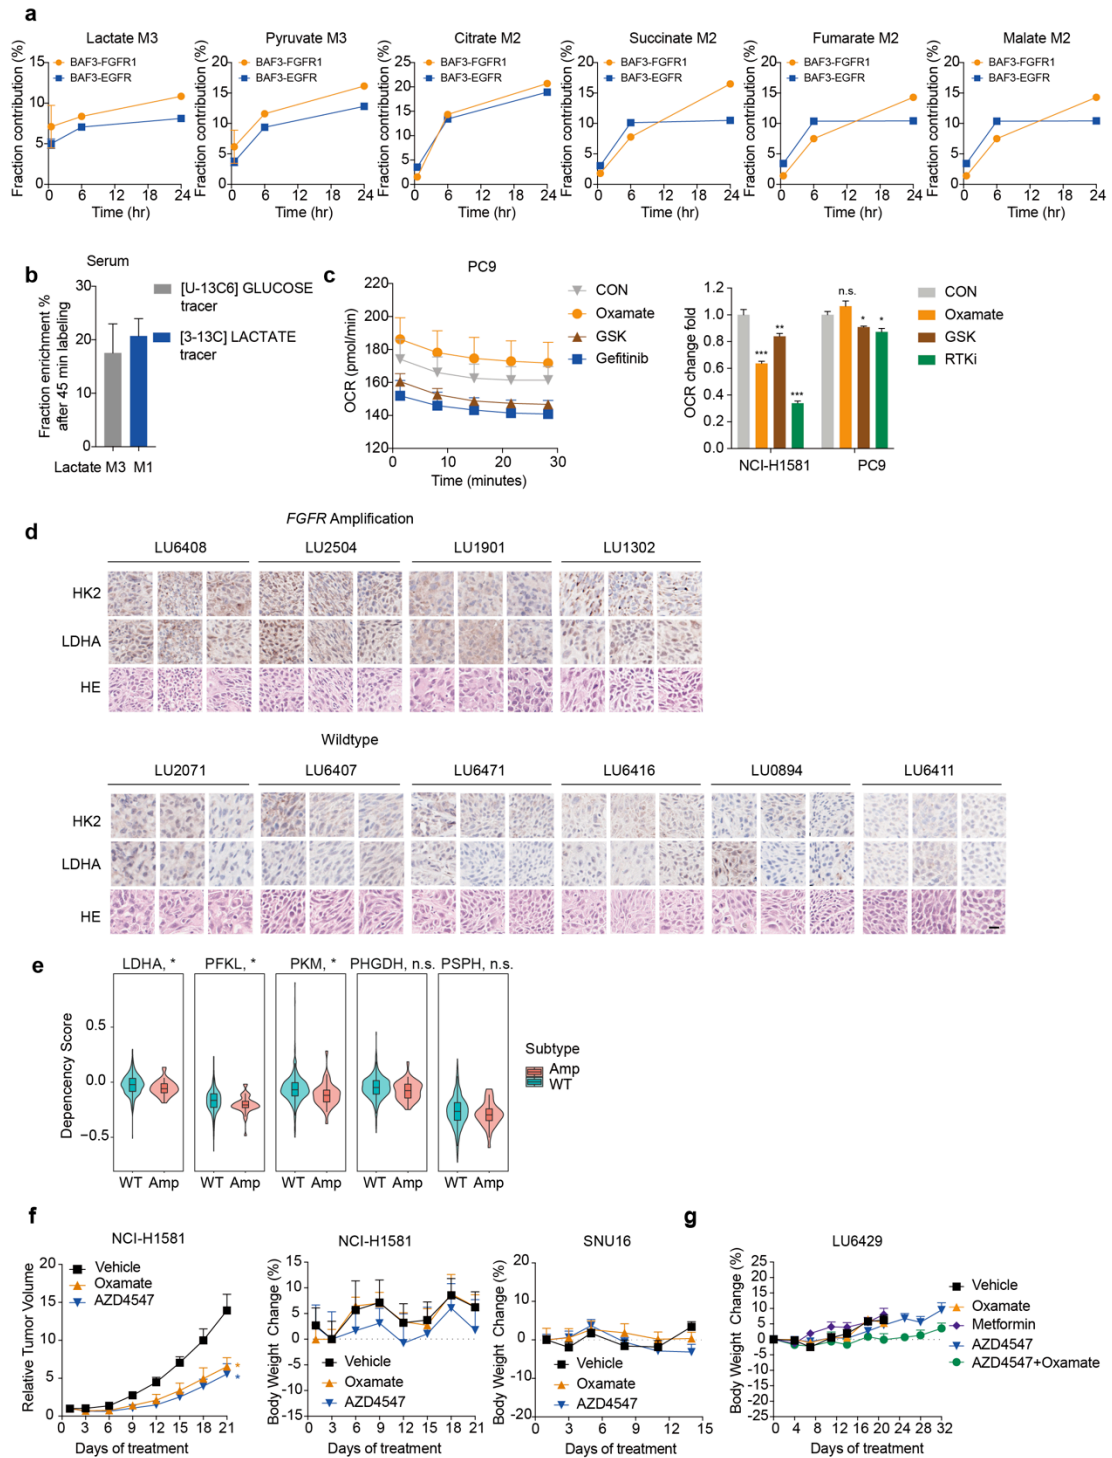

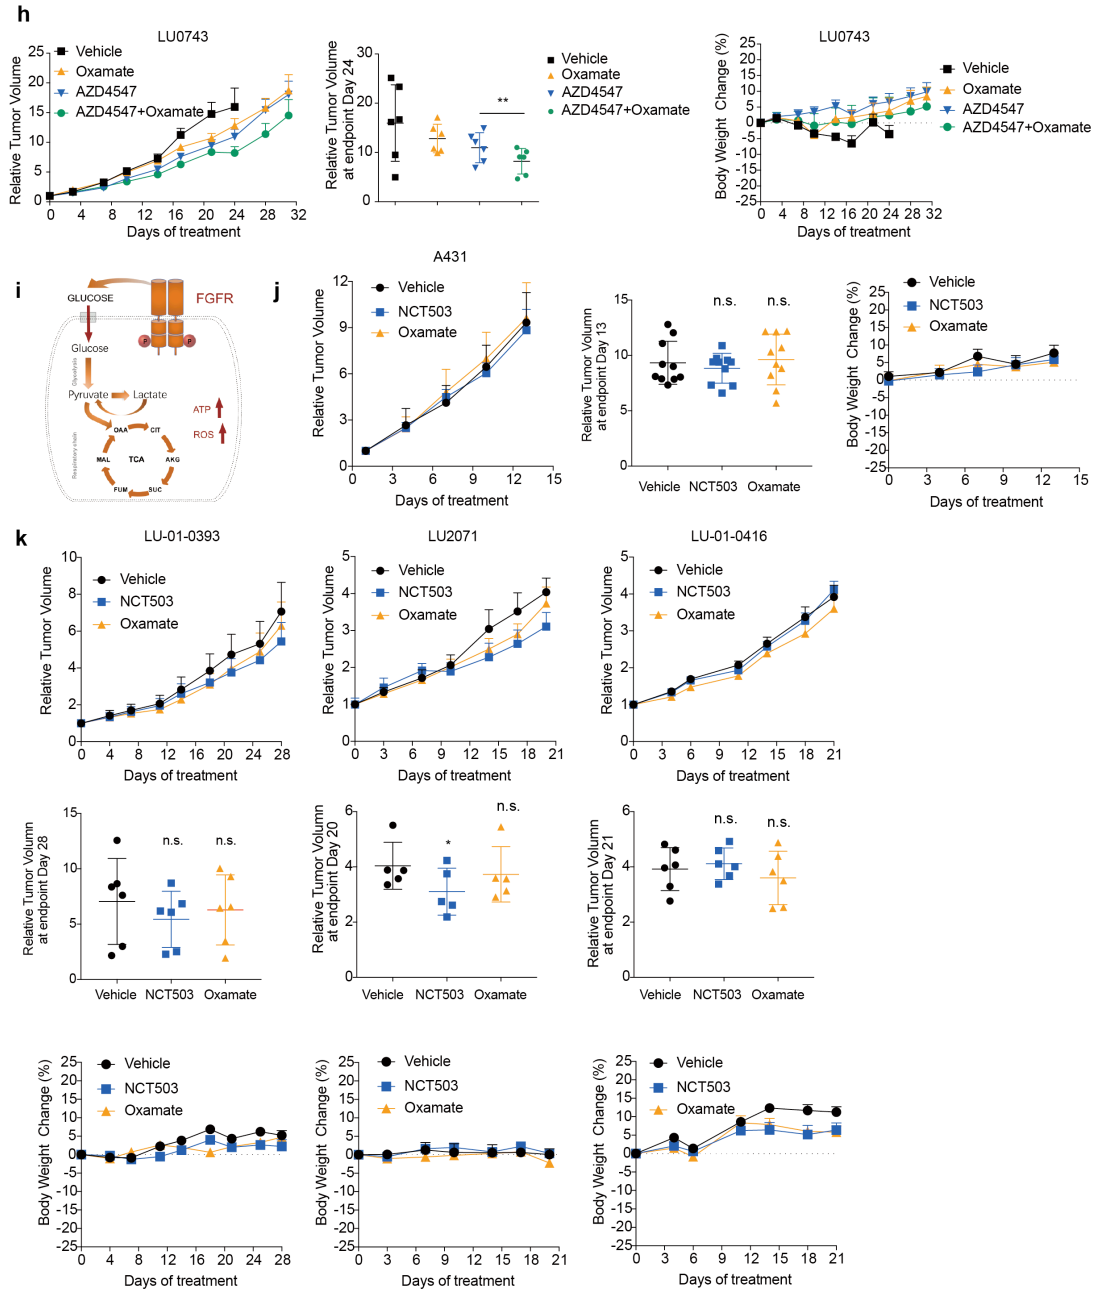

108 **Supplementary Figure 3**

109 **a**, Time courses of  $^{13}\text{C}$  labeled intensities of metabolites from  $[\text{U-}^{13}\text{C}_3]$ -lactate flux  
110 analysis measured by GC/MS. The labeling curves were plotted by measuring  
111 fractional  $^{13}\text{C}$  enrichment at 0.5, 6 and 24 hr respectively. BAF3-EGFR/FGFR1 cells  
112 were cultured without IL3. The assays were performed in biological triplicates, and  
113 error bars represented SD. **b**, Serum fractional enrichment of lactate. Mice with flank  
114 xenografts of H1581 cells were co-injected with  $[\text{U-}^{13}\text{C}_6]$ -glucose and  $[3\text{-}^{13}\text{C}]$ -lactate  
115 intravenously and the serum was collected at 30 min ( $n = 6$  mice per group). Data  
116 were means and error bars represented SEM. **c**, Left, OCR measurement. OCR was  
117 measured following the treatment with Oxamate (10 mM, 6 hr), GSK2837808A (20  
118  $\mu\text{M}$ , 6 hr) or Gefitinib (100 nM, 24 hr) using Seahorse XF96 analyzer. Right, OCR  
119 change fold. The OCR values were normalized by the control group without treatment  
120 (CON). The assays were performed in biological four replicates, and error bars  
121 represented SD. **d**, Immunohistochemistry analysis of representative tumor tissues  
122 from NSCLC PDX models with *FGFR* gene alteration or wildtype RTK. Shown are  
123 representative fields from one section per tumor tissue ( $n = 3$  independent tumor  
124 tissues from each PDX model). Scale bar, 20  $\mu\text{m}$ . **e**, Dependency score for metabolic



125 genes in cell lines with (Amp) or without (WT) *FGFR* amplification. Data were  
126 extracted from public dataset Project Achilles. \*  $p < 0.05$  was considered to be  
127 statistically significant. **f**, Left: tumor growth curve of NCI-H1581 xenograft model.  
128 Mice bearing NCI-H1581 tumors were treated with Oxamate (750 mg/kg) and  
129 AZD4547 (2.5 mg/kg) daily for 21 days ( $n = 5$ ). Growth curve was plotted by  
130 measuring the tumor volume three times per week. Right: Body weight change of  
131 NCI-H1581 and SNU16 xenograft models. Data were means and error bars  
132 represented SEM. **g**, Body weight of LU6429 PDX model. Oxamate (750 mg/kg),  
133 Metformin (250 mg/kg), AZD4547 (10 mg/kg) or indicated combinations were given  
134 daily ( $n = 6$  except for Oxamate-treated group  $n = 7$ ). Data were means and error bars  
135 represented SEM. **h**, Tumor growth curve, grouped scatter plot of individual mice  
136 relative tumor volume on Day 24 and body weight change of LU0743 PDX model.  
137 Mice were treated with Oxamate (750 mg/kg), AZD4547 (5 mg/kg) or indicated  
138 combination daily for 32 days ( $n = 6$ ). Growth curve was plotted by measuring the  
139 tumor volume three times per week. Data were means and error bars represented SEM.  
140 **i**, Diagram depicting the metabolic reprogramming upon *FGFR* activation. **j-k**, Tumor

141 growth curve, grouped scatter plot of individual mice relative tumor volume at the  
142 endpoint, and body weight change of A431 xenograft and three PDX models. Mice  
143 bearing indicated tumors were treated with Oxamate (750 mg/kg) or NCT503 (40  
144 mg/kg) daily for indicated days (n = 10 for A431, n = 5 for LU2071, n = 6 for  
145 LU-01-0393 and LU-01-0416). Data were means and error bars represented SEM. For  
146 all bar graphs, \*\*\* p < 0.001, \*\* p < 0.01, \* p < 0.05, n.s. ≥ 0.05 for Student's pairwise t  
147 test. Source data are provided as a Source Data file.

148

149

150 **Supplementary Figure 4**

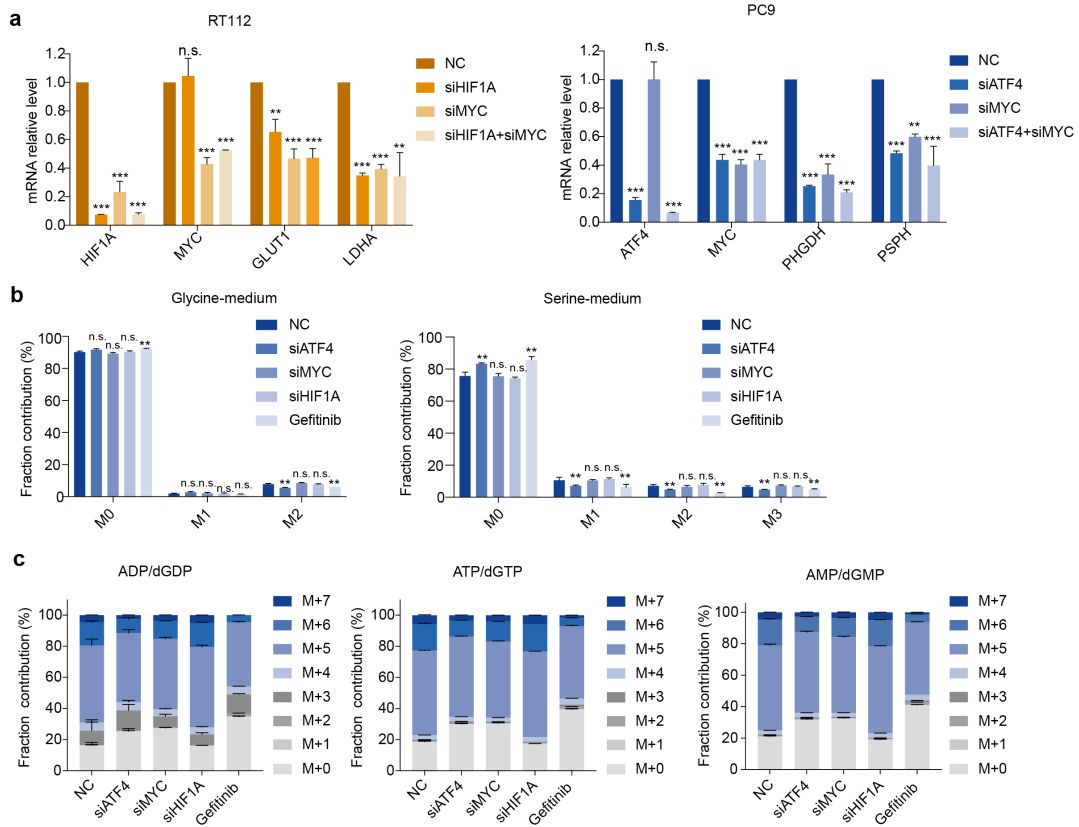

151

152

153 **Supplementary Figure 4**

154 **a**, RT-qPCR transcript analysis. RT112 and PC9 cells were transfected with indicated  
155 siRNA for 48 hr and mRNA level of indicated genes was measured by RT-qPCR.  
156 Data were means of triplicate wells; error bars represented SD. **b**, Analysis of  
157 glucose-derived serine and glycine in the medium of PC9 cells. Cells were transfected  
158 with indicated siRNA for 48 hr followed by 24 hr-culture in the presence of  
159 [U-<sup>13</sup>C<sub>6</sub>]-glucose. Serine and glycine were measured by GC/MS. Gefitinib treatment  
160 (100 nM, 24 hr) was used as a positive control. **c**, Analysis of glucose-derived purine  
161 nucleosides in PC9 cells. Cells were treated as in **b** and purine nucleoside was  
162 measured by QTOF-MS. Data in **b-c** were means of triplicates; error bars represented  
163 SEM. For all bar graphs, \*\*\*  $p < 0.001$ , \*\*  $p < 0.01$ , \*  $p < 0.05$ , n.s.  $\geq 0.05$  for Student's  
164 pairwise t test. Source data are provided as a Source Data file.

165
